# Supplementary material for: ResSUMO: A Deep Learning Architecture Based on Residual Structure for Prediction of Lysine SUMOylation Sites
Source: MDPI journal article supplement (doi:10.3390/cells11172646), 2022-08-25
Supplement: s1 [file s1]

# ResSUMO: A Deep Learning Architecture Based on Residual Structure for Prediction of Lysine SUMOylation Sites

Yafei Zhu<sup>1</sup>, Yuhai Liu<sup>2</sup>, Yu Chen<sup>1</sup>, Lei Li<sup>3,1\*</sup>

**Table S1.** A comprehensive summary of the reported classifiers for predicting SUMOylation sites.

| Tool          | Algorithm*      | Encoding scheme                                | Evaluation strategy | Benchmark Dataset (positives/negatives) | Balanced Samples? | Web Server | Code availability | Window size | Published year | PMID     |
|---------------|-----------------|------------------------------------------------|---------------------|-----------------------------------------|-------------------|------------|-------------------|-------------|----------------|----------|
| pSumo-CD      | CD              | PseAAC                                         | cross-validation    | 755/9,944                               | No                | No         | No                | 21          | 2016           | 27354696 |
| iAcet-Sumo    | SVM             | One-Hot                                        | cross-validation    | 5,963/13,743                            | No                | No         | No                | 21          | 2018           | 30015011 |
| SUMOgo        | SVM             | BE; AAindex; Structural features               | independent test    | 1,166/2,332                             | Yes               | No         | No                | 21          | 2018           | 30341374 |
| SumSec        | Bagging C4.5 DT | SSpre-occur; SSpre-bigram                      | cross-validation    | 780/780                                 | Yes               | No         | No                | 31          | 2018           | 30544729 |
| HseSUMO       | DT              | HSE                                            | cross-validation    | 780/780                                 | Yes               | No         | No                | 31          | 2019           | 30999862 |
| SUMO-Forest   | Cascade Forest  | SP; BK                                         | cross-validation    | 755/9,944                               | No                | No         | Yes               | 21          | 2020           | 32160959 |
| C-iSUMO       | AdaBoost DT     | ASA; Torsion Angles                            | cross-validation    | 780/780                                 | Yes               | No         | No                | 31          | 2020           | 32604027 |
| iSUMOK-PseAAC | ANN             | PseAAC; SVV; SM;FV; PRIM; RPRIM; AAPIV; RAAPIV | Independent test    | 4,987/5,000                             | Yes               | No         | Yes               | 41          | 2021           | 34430072 |

\* CD: covariant discriminant; SVM: support vector machine; DT: decision tree; ANN: artificial neural network; PseAAC: pseudo-position specific scoring matrix; AAindex: a database of amino acid indices and amino acid mutation matrices; SSpre-occur and SSpre-bigram: predicted secondary structure occurrence and profile-bigram; HSE: half-sphere exposure; SP: statistics property; BK: bi-gram and k-skip-bi-gram; ASA: accessible surface area; SVV: site vicinity vector; SM: statistical moments; FV: frequency vector; PRIM: position relative incidence matrix; RPRIM: reverse position relative incidence matrix; AAPIV: accumulative absolute position incidence vector; RAAPIV: reverse accumulative absolute position incidence vector; RSCNN: The residual structure layered CNN architecture.

**Table S2.** The experimental data used in this study were derived from three literature and one database.

| Source        | Species | Number of SUMOylation sites | Published year | PMID     |
|---------------|---------|-----------------------------|----------------|----------|
| PLMD database | Human   | 7820                        | 2017           | 28529077 |
| literature    | Human   | 40765                       | 2017           | 28112733 |
| literature    | Human   | 14869                       | 2018           | 29942033 |
| literature    | Human   | 4987                        | 2021           | 34430072 |

**Table S3.** Summary of the 14 types of physicochemical properties of amino acids. For each property, there is a set of 20 numerical values for all amino acids.

| Accession<br>number | A     | R     | N     | D     | C     | Q     | E     | G     | H     | I     | L     | K     | M     | F     | P     | S     | T     | W     | Y     | V     |
|---------------------|-------|-------|-------|-------|-------|-------|-------|-------|-------|-------|-------|-------|-------|-------|-------|-------|-------|-------|-------|-------|
| FAUJ830101          | 0.31  | -1.01 | -0.60 | -0.77 | 1.54  | -0.22 | -0.64 | 0.00  | 0.13  | 1.80  | 1.70  | -0.99 | 1.23  | 1.79  | 0.72  | -0.04 | 0.26  | 2.25  | 0.96  | 1.22  |
| FINA910104          | 1.    | 1.70  | 1.    | 0.70  | 1.    | 1.    | 0.70  | 1.50  | 1.    | 1.    | 1.    | 1.70  | 1.    | 1.    | 0.10  | 1.    | 1.    | 1.    | 1.    | 1.    |
| GARJ730101          | 0.28  | 0.10  | 0.25  | 0.21  | 0.28  | 0.35  | 0.33  | 0.17  | 0.21  | 0.82  | 1.00  | 0.09  | 0.74  | 2.18  | 0.39  | 0.12  | 0.21  | 5.70  | 1.26  | 0.60  |
| GUYH850101          | 0.10  | 1.91  | 0.48  | 0.78  | -1.42 | 0.95  | 0.83  | 0.33  | -0.50 | -1.13 | -1.18 | 1.40  | -1.59 | -2.12 | 0.73  | 0.52  | 0.07  | -0.51 | -0.21 | -1.27 |
| LEVM760101          | -0.5  | 3.0   | 0.2   | 2.5   | -1.0  | 0.2   | 2.5   | 0.0   | -0.5  | -1.8  | -1.8  | 3.0   | -1.3  | -2.5  | -1.4  | 0.3   | -0.4  | -3.4  | -2.3  | -1.5  |
| RADA880108          | -0.06 | -0.84 | -0.48 | -0.80 | 1.36  | -0.73 | -0.77 | -0.41 | 0.49  | 1.31  | 1.21  | -1.18 | 1.27  | 1.27  | 0.    | -0.50 | -0.27 | 0.88  | 0.33  | 1.09  |
| FINA910102          | 1.    | 0.70  | 1.    | 1.70  | 1.    | 1.    | 1.70  | 1.30  | 1.    | 1.    | 1.    | 0.70  | 1.    | 1.    | 13.   | 1.    | 1.    | 1.    | 1.    | 1.    |
| OLSK800101          | 1.38  | 0.00  | 0.37  | 0.52  | 1.43  | 0.22  | 0.71  | 1.34  | 0.66  | 2.32  | 1.47  | 0.15  | 1.78  | 1.72  | 0.85  | 0.86  | 0.89  | 0.82  | 0.47  | 1.99  |
| KIDA850101          | -0.27 | 1.87  | 0.81  | 0.81  | -1.05 | 1.10  | 1.17  | -0.16 | 0.28  | -0.77 | -1.10 | 1.70  | -0.73 | -1.43 | -0.75 | 0.42  | 0.63  | -1.57 | -0.56 | -0.40 |
| NADH010102          | 51    | -144  | -84   | -78   | 137   | -128  | -115  | -13   | -55   | 106   | 103   | -205  | 73    | 108   | -79   | -26   | -3    | 69    | 11    | 108   |
| JANJ780101          | 27.8  | 94.7  | 60.1  | 60.6  | 15.5  | 68.7  | 68.2  | 24.5  | 50.7  | 22.8  | 27.6  | 103.0 | 33.5  | 25.5  | 51.5  | 42.0  | 45.0  | 34.7  | 55.2  | 23.7  |
| ZIMJ680104          | 6.00  | 10.76 | 5.41  | 2.77  | 5.05  | 5.65  | 3.22  | 5.97  | 7.59  | 6.02  | 5.98  | 9.74  | 5.74  | 5.48  | 6.30  | 5.68  | 5.66  | 5.89  | 5.66  | 5.96  |
| JANJ780103          | 15.   | 67.   | 49.   | 50.   | 5.    | 56.   | 55.   | 10.   | 34.   | 13.   | 16.   | 85.   | 20.   | 10.   | 45.   | 32.   | 32.   | 17.   | 41.   | 14.   |
| NADH010103          | 41    | -109  | -74   | -47   | 169   | -104  | -90   | -18   | -35   | 104   | 103   | -148  | 77    | 128   | -81   | -31   | 10    | 102   | 36    | 116   |

**Table S4.** ZScale for the 20 amino acids.

| Amino acid | Z1    | Z2    | Z3    | Z4    | Z5    |
|------------|-------|-------|-------|-------|-------|
| A          | 0.24  | -2.32 | 0.60  | -0.14 | 1.30  |
| C          | 0.84  | -1.67 | 3.71  | 0.18  | -2.65 |
| D          | 3.98  | 0.93  | 1.93  | -2.46 | 0.75  |
| E          | 3.11  | 0.26  | -0.11 | -3.04 | -0.25 |
| F          | -4.22 | 1.94  | 1.06  | 0.54  | -0.62 |
| G          | 2.05  | 4.06  | 0.36  | -0.82 | -0.38 |
| H          | 2.47  | 1.95  | 0.26  | 3.90  | 0.09  |
| I          | -3.89 | -1.73 | -1.71 | -0.84 | 0.26  |
| K          | 2.29  | 0.89  | -2.49 | 1.49  | 0.31  |
| L          | -4.28 | -1.30 | -1.49 | -0.72 | 0.84  |
| M          | -2.85 | -0.22 | 0.47  | 1.94  | -0.98 |
| N          | 3.05  | 1.60  | 1.04  | -1.15 | 1.61  |
| P          | -1.66 | 0.27  | 1.84  | 0.70  | 2.00  |
| Q          | 1.75  | 0.50  | -1.44 | -1.34 | 0.66  |
| R          | 3.52  | 2.50  | -3.50 | 1.99  | -0.17 |
| S          | 2.39  | -1.07 | 1.15  | -1.39 | 0.67  |
| T          | 0.75  | -2.18 | -1.12 | -1.46 | -0.40 |
| V          | -2.59 | -2.64 | -1.54 | -0.85 | -0.02 |
| W          | -4.36 | 3.94  | 0.59  | 3.44  | -1.59 |
| Y          | -2.54 | 2.44  | 0.43  | 0.04  | -1.47 |

The property of each amino acid can be represented by five ZScale values [1].

**Table S5.** The AUC and PRC values are generated by the iLearnPlus-Estimator module in terms of 5-fold cross-validation.

| Feature* | AUC   | PRC   |
|----------|-------|-------|
| EAAC     | 0.749 | 0.727 |
| AAindex  | 0.737 | 0.721 |
| BLOSUM62 | 0.736 | 0.721 |
| ZScale   | 0.731 | 0.717 |
| OH       | 0.718 | 0.704 |
| EGAAC    | 0.717 | 0.697 |
| CKSAAP   | 0.691 | 0.673 |
| DDE      | 0.654 | 0.638 |
| DPC      | 0.653 | 0.637 |
| AAC      | 0.651 | 0.624 |
| PAAC     | 0.650 | 0.622 |

\* EAAC: Enhanced Amino Acid Composition; AAindex: Amino Acid indices; BLOSUM62: BLOcks SUBstitution Matrix 62; OH: One Hot; EGAAC: Enhanced Grouped Amino Acid Composition; CKSAAP: Enhanced Grouped Amino Acid Composition; DDE: Dipeptide Deviation from Expected Mean; DPC: Di-Peptide Composition; AAC: Amino Acid Composition; PAAC: Pseudo-Amino Acid Composition

**Table S6.** Performances of different models for predicting SUMOylation sites on the independent test.

| Model          | Sn                | Sp                | MCC               | ACC               | AUC               |
|----------------|-------------------|-------------------|-------------------|-------------------|-------------------|
| RF_AAindex     | $0.698 \pm 0.003$ | $0.650 \pm 0.000$ | $0.349 \pm 0.003$ | $0.674 \pm 0.001$ | $0.745 \pm 0.002$ |
| RF_BLOSUM62    | $0.671 \pm 0.005$ | $0.650 \pm 0.000$ | $0.321 \pm 0.005$ | $0.660 \pm 0.003$ | $0.728 \pm 0.001$ |
| RF_EAAC        | $0.694 \pm 0.003$ | $0.650 \pm 0.000$ | $0.345 \pm 0.003$ | $0.672 \pm 0.002$ | $0.741 \pm 0.002$ |
| RF_ZScale      | $0.669 \pm 0.005$ | $0.650 \pm 0.000$ | $0.319 \pm 0.005$ | $0.660 \pm 0.002$ | $0.726 \pm 0.001$ |
| LGBM_AAindex   | $0.719 \pm 0.005$ | $0.650 \pm 0.000$ | $0.369 \pm 0.005$ | $0.684 \pm 0.003$ | $0.756 \pm 0.002$ |
| LGBM_BLOSUM62  | $0.712 \pm 0.003$ | $0.650 \pm 0.000$ | $0.362 \pm 0.003$ | $0.681 \pm 0.002$ | $0.755 \pm 0.001$ |
| LGBM_EAAC      | $0.741 \pm 0.006$ | $0.650 \pm 0.000$ | $0.393 \pm 0.006$ | $0.696 \pm 0.003$ | $0.765 \pm 0.002$ |
| LGBM_ZScale    | $0.701 \pm 0.006$ | $0.650 \pm 0.000$ | $0.351 \pm 0.006$ | $0.675 \pm 0.003$ | $0.745 \pm 0.003$ |
| CNN_AAindex    | $0.777 \pm 0.009$ | $0.650 \pm 0.000$ | $0.431 \pm 0.009$ | $0.714 \pm 0.004$ | $0.790 \pm 0.003$ |
| CNN_BLOSUM62   | $0.782 \pm 0.007$ | $0.650 \pm 0.000$ | $0.436 \pm 0.007$ | $0.716 \pm 0.003$ | $0.789 \pm 0.001$ |
| CNN_EAAC       | $0.779 \pm 0.004$ | $0.650 \pm 0.000$ | $0.432 \pm 0.004$ | $0.714 \pm 0.002$ | $0.785 \pm 0.001$ |
| CNN_ZScale     | $0.771 \pm 0.004$ | $0.650 \pm 0.000$ | $0.424 \pm 0.005$ | $0.711 \pm 0.002$ | $0.786 \pm 0.002$ |
| RSCNN_AAindex  | $0.792 \pm 0.005$ | $0.650 \pm 0.000$ | $0.447 \pm 0.005$ | $0.721 \pm 0.002$ | $0.801 \pm 0.003$ |
| RSCNN_BLOSUM62 | $0.794 \pm 0.006$ | $0.650 \pm 0.000$ | $0.448 \pm 0.006$ | $0.722 \pm 0.003$ | $0.801 \pm 0.003$ |
| RSCNN_EAAC     | $0.755 \pm 0.007$ | $0.650 \pm 0.000$ | $0.408 \pm 0.008$ | $0.703 \pm 0.004$ | $0.773 \pm 0.002$ |
| RSCNN_ZScale   | $0.795 \pm 0.007$ | $0.650 \pm 0.000$ | $0.450 \pm 0.008$ | $0.722 \pm 0.003$ | $0.801 \pm 0.003$ |

**Table S7.** Performance comparison of the original models and reproduced models.

| Model                    | Sn    | Sp    | MCC   | ACC   | AUC   |
|--------------------------|-------|-------|-------|-------|-------|
| SUMO-Forest (original)   | 92.05 | 99.03 | 98.54 | 89.15 | 99.05 |
| SUMO-Forest*             | 95.36 | 98.13 | 97.93 | 86.00 | 98.96 |
| ISUMOK-PseAAC (original) | 94.51 | 94.24 | 94.79 | 89.03 | 96.09 |
| ISUMOK-PseAAC*           | 93.72 | 93.46 | 93.59 | 87.19 | 96.10 |

The performances of the original SUMO-Forest and ISUMOK-PseAAC were extracted from literature [2, 3]. The models marked by \* were reproduced according to the literature.

**Table S8.** The performances of the reproduced models on our independent test dataset#.

| Model          | Sn    | Sp    | MCC   | ACC   | AUC   |
|----------------|-------|-------|-------|-------|-------|
| SUMO-Forest*   | 8.95  | 95.07 | 52.01 | 7.94  | 52.55 |
| ISUMOK-PseAAC* | 56.27 | 55.30 | 55.78 | 11.57 | 57.47 |

#The independent test dataset contained 3,728 SUMOylation sites and 3,728 non-SUMOylation sites.

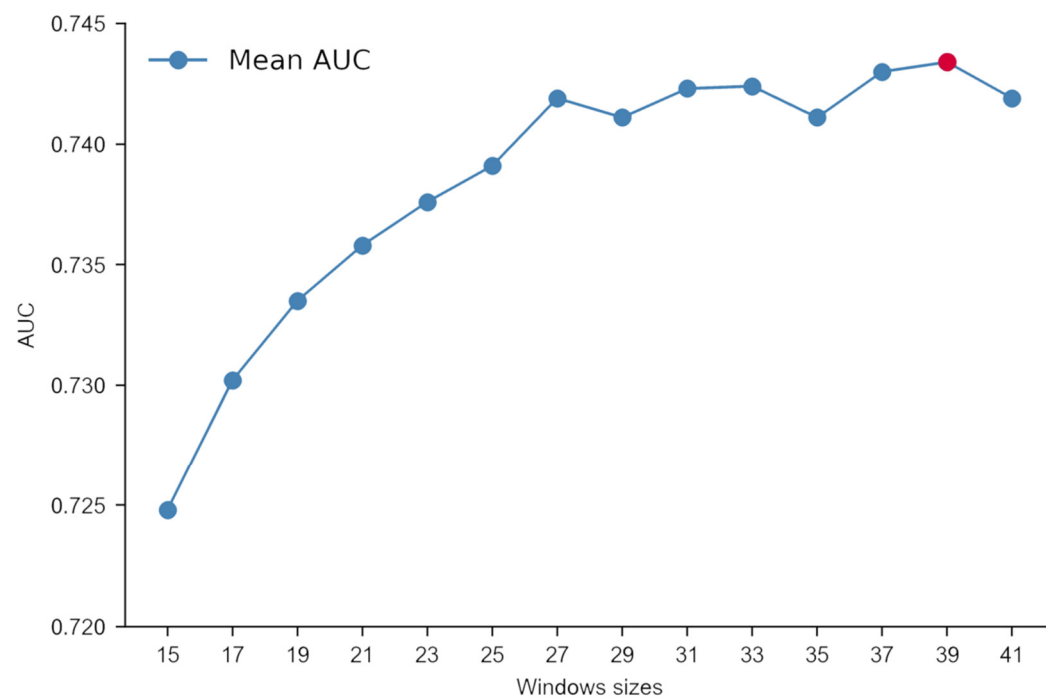

**Figure S1.** The performance of the RF\_EAAC classifier was constructed using different window sizes through the five-fold cross-validation. Window size of 39 highlighted by the red spot was selected as the peptide length for the classifier construction in this study.





| A | A  | R  | N  | D  | C  | Q  | E  | G  | H  | I  | L  | K  | M  | F  | P  | S  | T  | W  | Y  | V |
|---|----|----|----|----|----|----|----|----|----|----|----|----|----|----|----|----|----|----|----|---|
| R | -1 | 5  |    |    |    |    |    |    |    |    |    |    |    |    |    |    |    |    |    |   |
| N | -2 | 0  | 6  |    |    |    |    |    |    |    |    |    |    |    |    |    |    |    |    |   |
| D | -2 | -2 | 1  | 6  |    |    |    |    |    |    |    |    |    |    |    |    |    |    |    |   |
| C | 0  | -3 | -3 | -3 | 9  |    |    |    |    |    |    |    |    |    |    |    |    |    |    |   |
| Q | -1 | 1  | 0  | 0  | -3 | 5  |    |    |    |    |    |    |    |    |    |    |    |    |    |   |
| E | -1 | 0  | 0  | 2  | -4 | 2  | 5  |    |    |    |    |    |    |    |    |    |    |    |    |   |
| G | 0  | -2 | 0  | -1 | -3 | -2 | -2 | 6  |    |    |    |    |    |    |    |    |    |    |    |   |
| H | -2 | 0  | 1  | -1 | -3 | 0  | 0  | -2 | 8  |    |    |    |    |    |    |    |    |    |    |   |
| I | -1 | -3 | -3 | -3 | -1 | -3 | -3 | -4 | -3 | 4  |    |    |    |    |    |    |    |    |    |   |
| L | -1 | -2 | -3 | -4 | -1 | -2 | -3 | -4 | -3 | 2  | 4  |    |    |    |    |    |    |    |    |   |
| K | -1 | 2  | 0  | -1 | -3 | 1  | 1  | -2 | -1 | -3 | -2 | 5  |    |    |    |    |    |    |    |   |
| M | -1 | -1 | -2 | -3 | -1 | 0  | -2 | -3 | -2 | 1  | 2  | -1 | 5  |    |    |    |    |    |    |   |
| F | -2 | -3 | -3 | -3 | -2 | -3 | -3 | -3 | -1 | 0  | 0  | -3 | 0  | 6  |    |    |    |    |    |   |
| P | -1 | -2 | -2 | -1 | -3 | -1 | -1 | -2 | -2 | -3 | -3 | -1 | -2 | -4 | 7  |    |    |    |    |   |
| S | 1  | -1 | 1  | 0  | -1 | 0  | 0  | 0  | -1 | -2 | -2 | 0  | -1 | -2 | -1 | 4  |    |    |    |   |
| T | 0  | -1 | 0  | -1 | -1 | -1 | -1 | -2 | -2 | -1 | -1 | -1 | -1 | -2 | -1 | 1  | 5  |    |    |   |
| W | -3 | -3 | -4 | -4 | -2 | -2 | -3 | -2 | -2 | -3 | -2 | -3 | -1 | 1  | -4 | -3 | -2 | 11 |    |   |
| Y | -2 | -2 | -2 | -3 | -2 | -1 | -2 | -3 | 2  | -1 | -1 | -2 | -1 | 3  | -3 | -2 | -2 | 2  | 7  |   |
| V | 0  | -3 | -3 | -3 | -1 | -2 | -2 | -3 | -3 | 3  | 1  | -2 | 1  | -1 | -2 | -2 | 0  | -3 | -1 | 4 |

**Figure S3.** The BLOSUM62 amino acid substitution matrix [4].

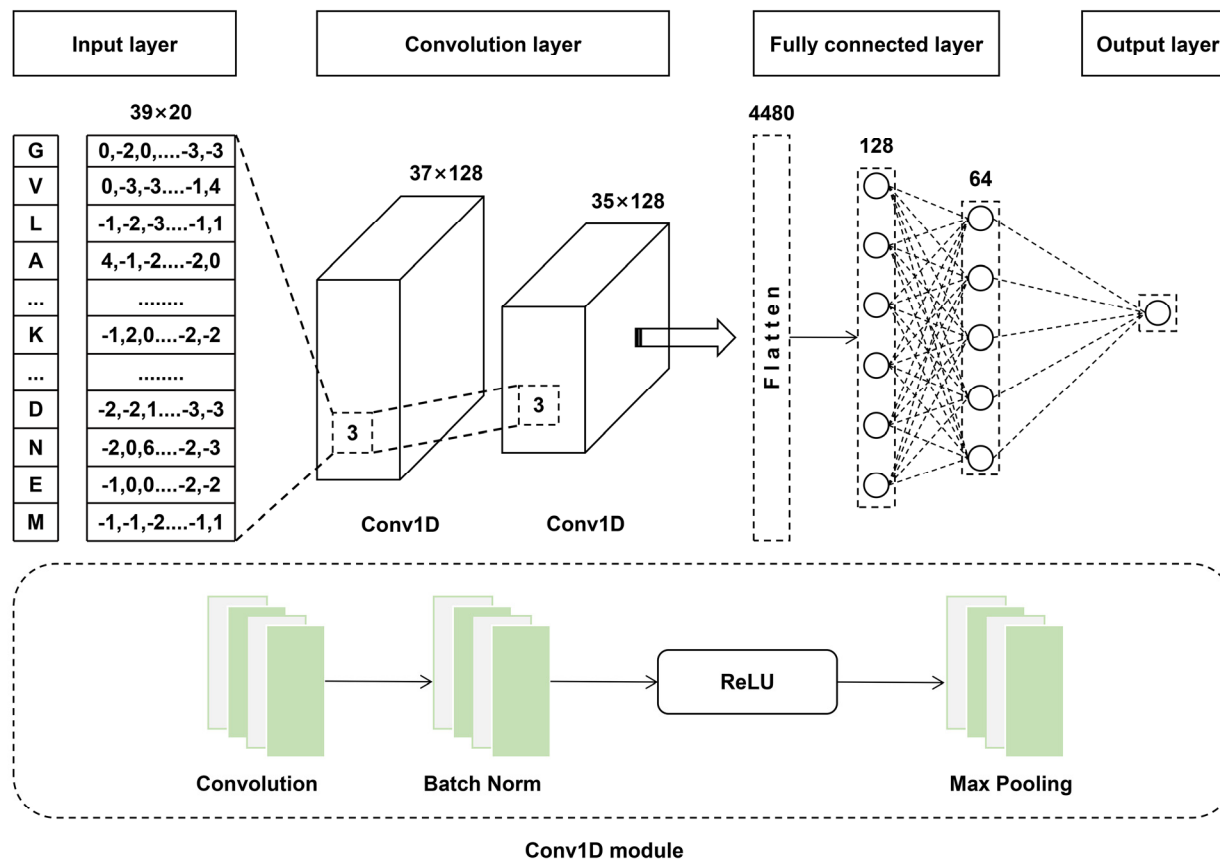

**Figure S4.** An illustrated example of the architecture of deep learning for the CNN model used the BLOSUM62 encoding approach as the characteristic matrix of the input layer.

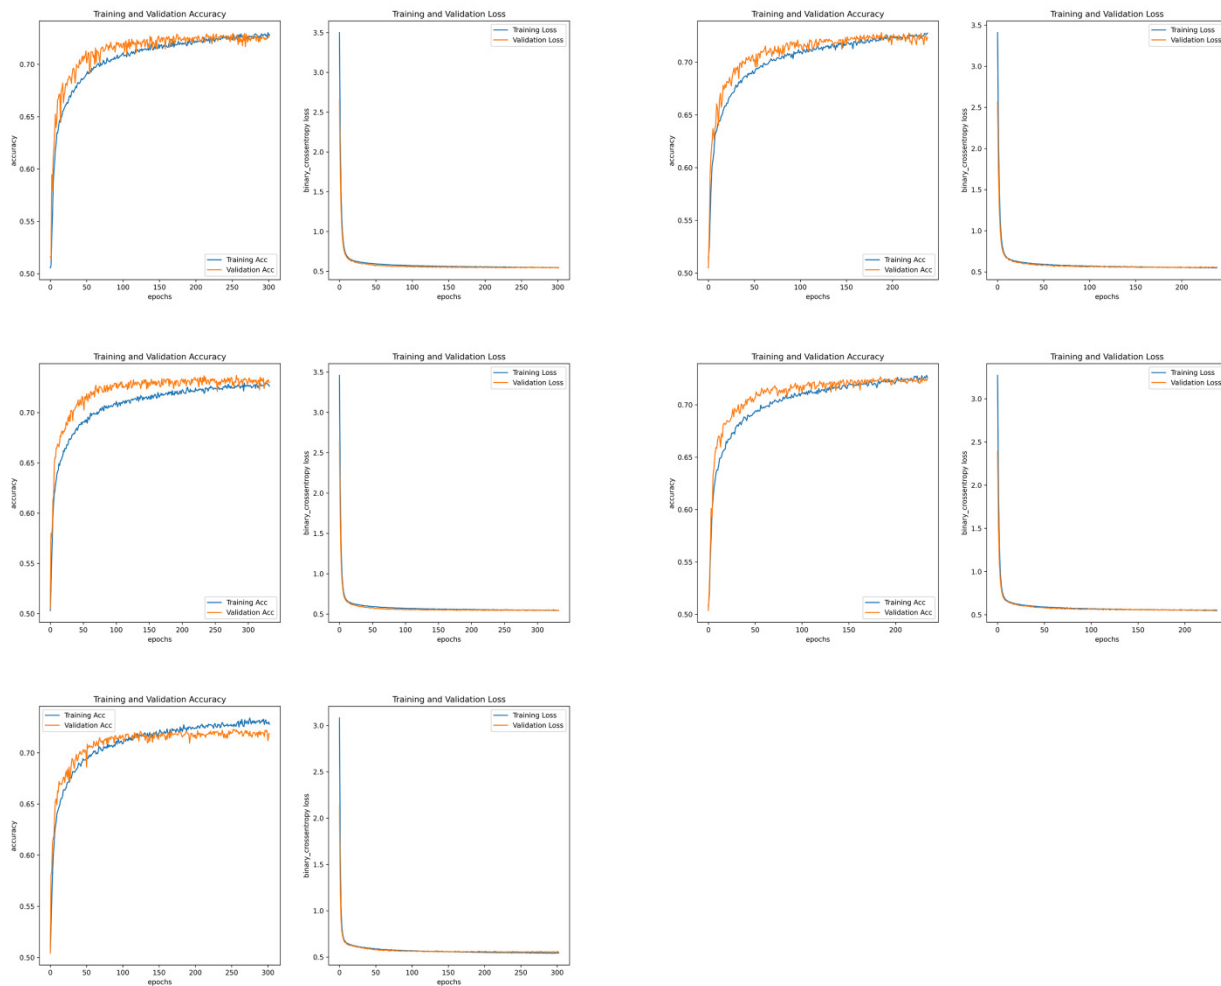

**Figure S5.** The training and validation accuracy and loss curves of the ResSUMO model for five-fold cross-validation. The training curves were colored orange, and the validation curves were colored blue.

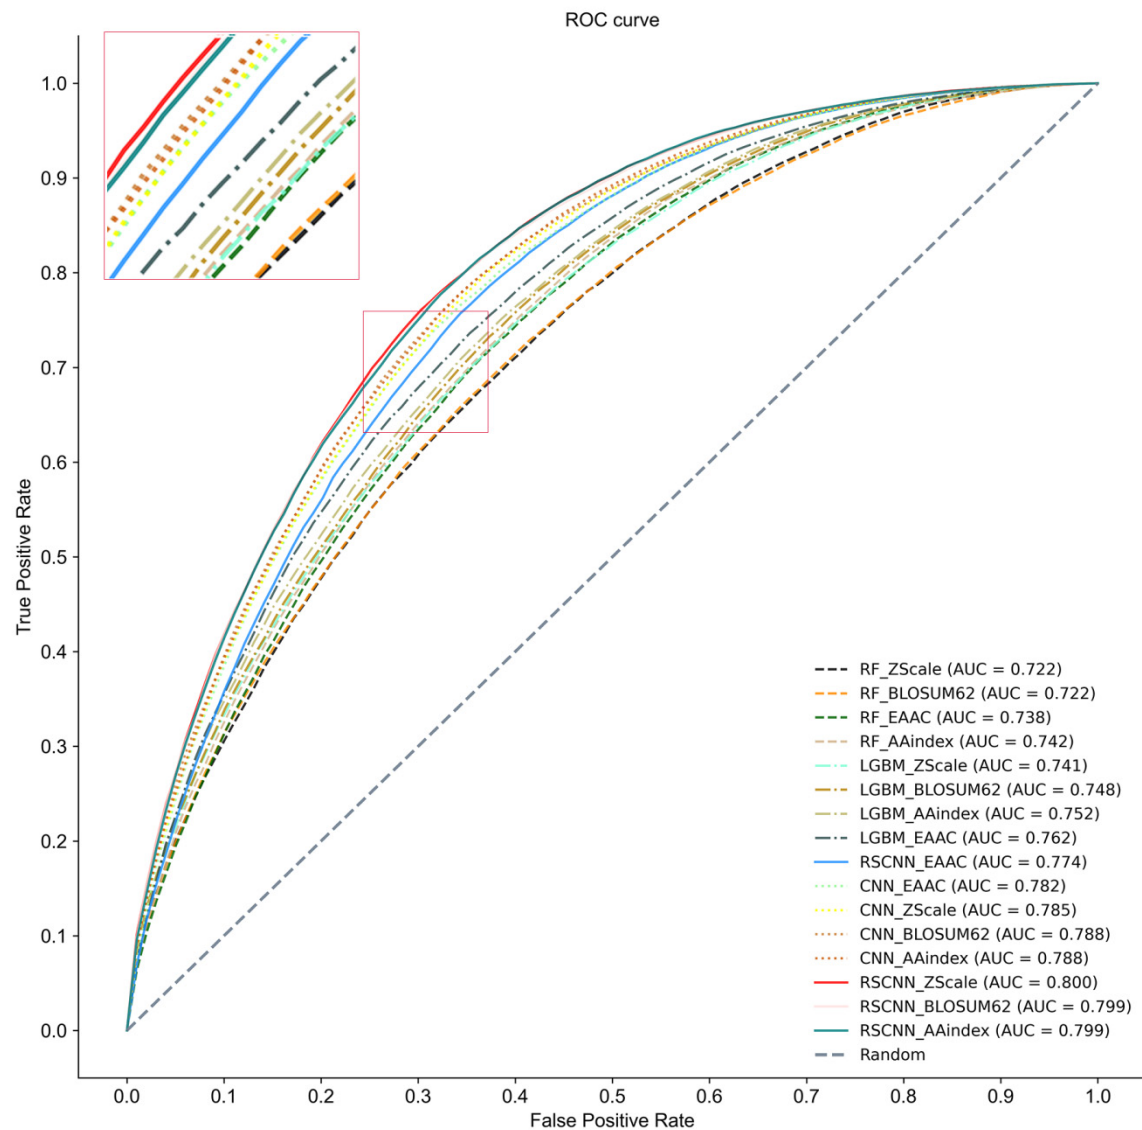

**Figure S6.** The AUC values of ResSUMO of different classifiers in terms of five-fold cross-validation.

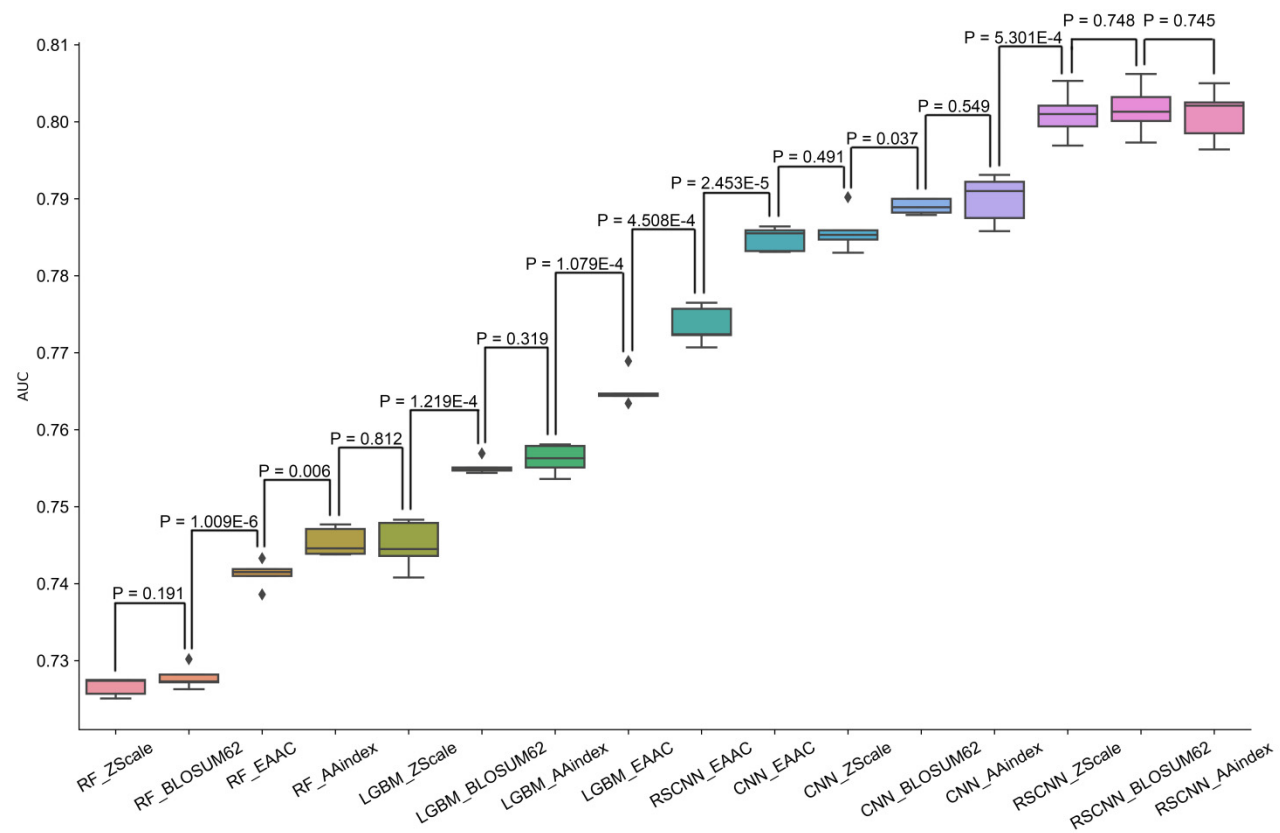

**Figure S7.** Performance comparison of the 16 models in the independent test.

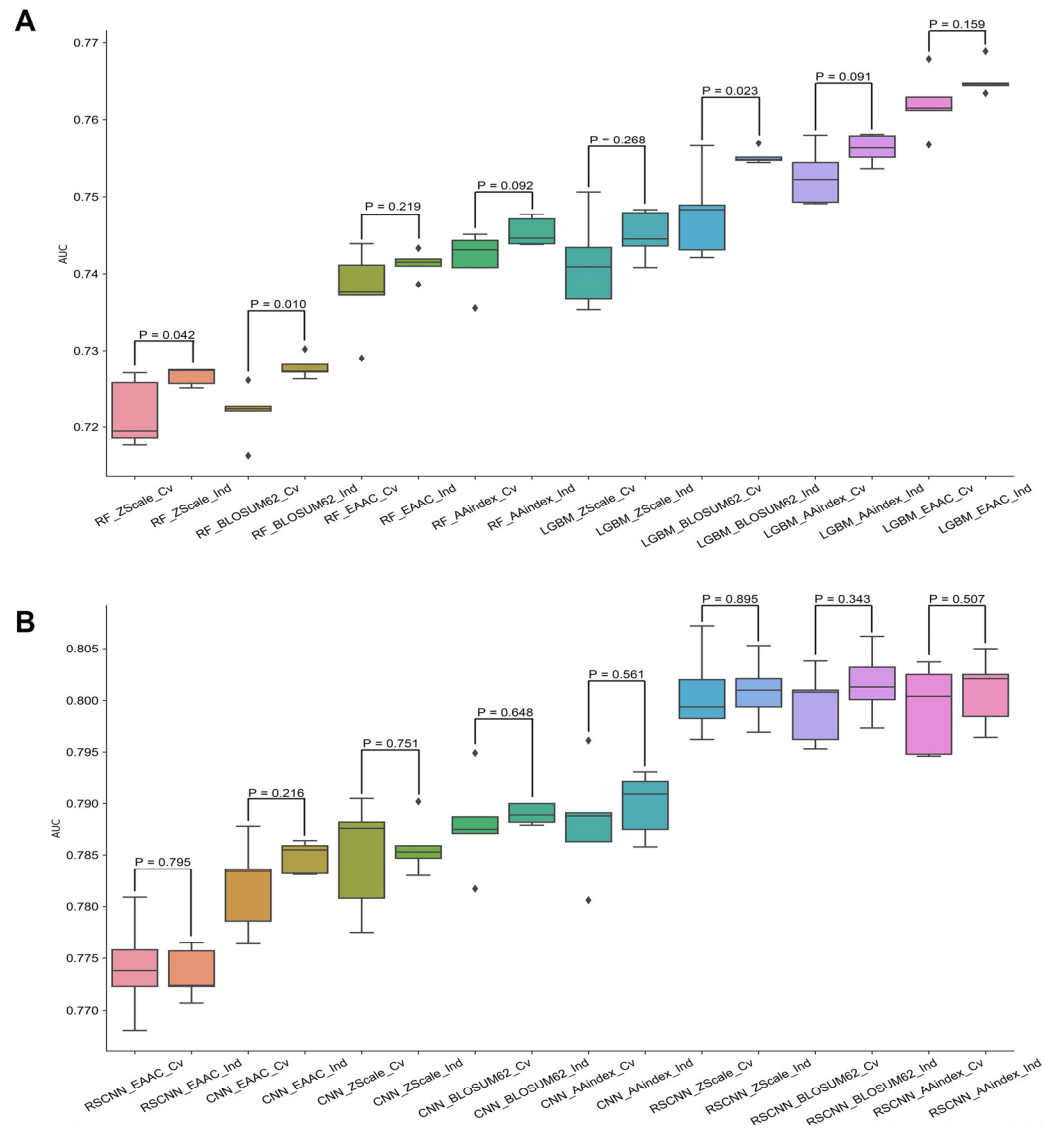

**Figure S8.** Performance comparison of each machine-learning model (A) or deep-learning model (B) in five-fold cross-validation and independent test.

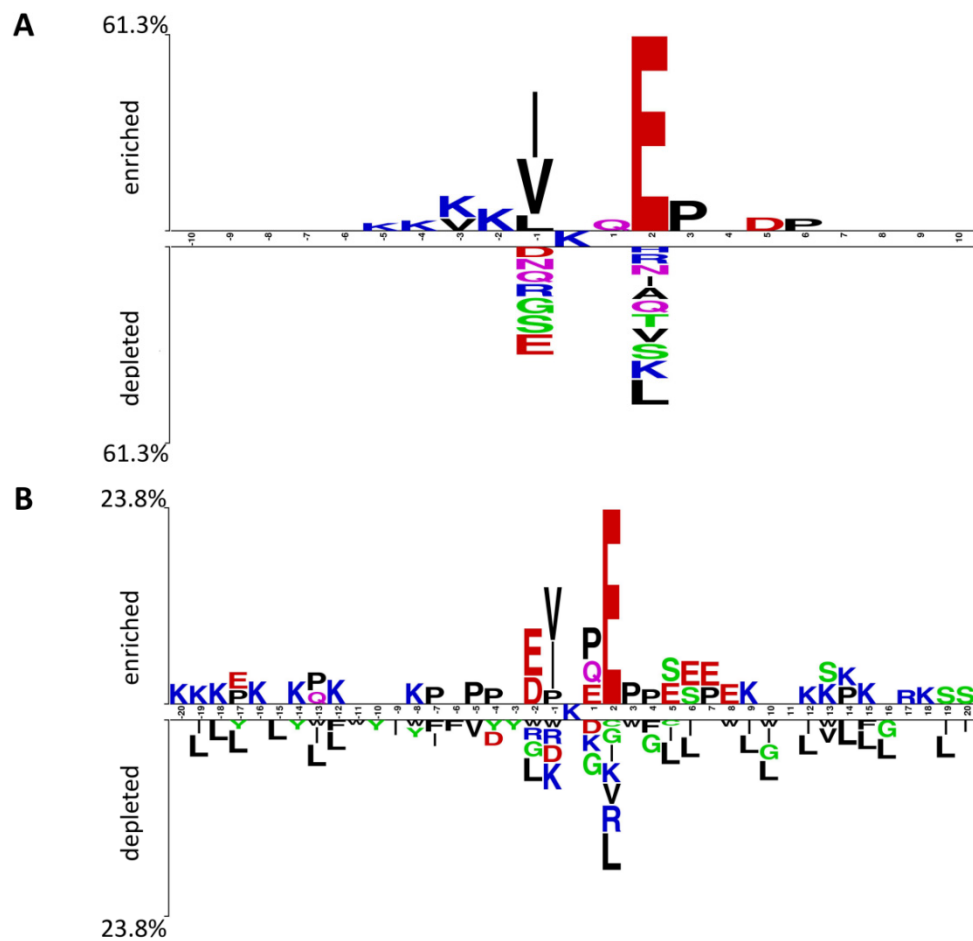

**Figure S9.** Sequence pattern surrounding the SUMOylation sites, including the significantly enriched and depleted residues, using the original dataset for the construction of SUMO-Forest [3] that included 755 positives (above) and 9,944 negatives (below) (A), and the dataset for iSUMOK-PseAAC [2] that included 4,987 positives and 5,000 negatives (B).  $P < 0.05$ , student's T-test with Bonferroni correction.



## References:

1. Chen Z, Zhao P, Li F et al. iFeature: a Python package and web server for features extraction and selection from protein and peptide sequences, *Bioinformatics* 2018;34:2499-2502.
2. Khan YD, Khan NS, Naseer S et al. iSUMOK-PseAAC: prediction of lysine sumoylation sites using statistical moments and Chou's PseAAC, *PeerJ* 2021;9:e11581.
3. Qian Y, Ye S, Zhang Y et al. SUMO-Forest: A Cascade Forest based method for the prediction of SUMOylation sites on imbalanced data, *Gene* 2020;741:144536.
4. Pearson WR. Selecting the Right Similarity-Scoring Matrix, *Curr Protoc Bioinformatics* 2013;43:3 5 1-3 5 9.
5. Chen Z, Zhao P, Li C et al. iLearnPlus: a comprehensive and automated machine-learning platform for nucleic acid and protein sequence analysis, prediction and visualization, *Nucleic Acids Res* 2021;49:e60.
